# Supplementary material for: Mercury screening in highly consumed sharpnose sharks (Rhizoprionodon lalandii and R. porosus) caught artisanally in southeastern Brazil
Source: Oxford University Press journal article supplement (doi:10.1525/elementa.022), 2020-01-01
Supplement: data_s1.xlsx [file data_s1.xlsx]

## Sheet: Sheet1
Saquarema	Species	Code	Sample Site	Sex	Development	Hg muscle (mg kg-1 w.w.)	Hg liver (mg kg-1 w.w.)	Hg brain (mg kg-1 w.w.)
	Rhizoprionodon lalandii	R1	Saquarema	F	Adult	0.24	0.07	0.0520
	Rhizoprionodon lalandii	R2	Saquarema	F	Adult	0.21	0.07	0.0720
	Rhizoprionodon lalandii	R3	Saquarema	F	Adult	0.17	ns*	0.0390
Recreio	Species	Code	Sample Site	Sex	Development	Hg muscle (mg kg-1 w.w.)	Hg liver (mg kg-1 w.w.)	Hg brain (mg kg-1 w.w.)
	Rhizoprionodon lalandii	R4	Recreio dos Bandeirantes	F	Pregnant adult	1.33	3.45	0.2170
	Rhizoprionodon lalandii	R5	Recreio dos Bandeirantes	M	Embryo	0.25	0.05	0.0380
	Rhizoprionodon lalandii	R6	Recreio dos Bandeirantes	F	Embryo	0.20	0.04	0.0500
	Rhizoprionodon lalandii	R7	Recreio dos Bandeirantes	F	Embryo	0.21	0.04	0.0490
Rio das Ostras	Species	Code	Sample Site	Sex	Development	Hg muscle (mg kg-1 w.w.)	Hg liver (mg kg-1 w.w.)	Hg brain (mg kg-1 w.w.)
	Rhizoprionodon lalandii	R8	Rio das Ostras	M	Juvenile	0.09	0.02	0.0247
	Rhizoprionodon lalandii	R9	Rio das Ostras	F	Juvenile	0.14	0.04	ns*
	Rhizoprionodon lalandii	R10	Rio das Ostras	F	Juvenile	0.13	0.03	0.0263
	Rhizoprionodon lalandii	R11	Rio das Ostras	F	Juvenile	0.09	0.03	0.0077
	Rhizoprionodon lalandii	R12	Rio das Ostras	M	Juvenile	0.14	0.03	0.0166
	Rhizoprionodon lalandii	R13	Rio das Ostras	F	Juvenile	0.26	0.06	0.0255
	Rhizoprionodon lalandii	R14	Rio das Ostras	F	Juvenile	0.12	0.05	0.0391
Copacabana	Species	Code	Sample Site	Sex	Development	Hg muscle (mg kg-1 w.w.)	Hg liver (mg kg-1 w.w.)	Hg brain (mg kg-1 w.w.)
	Rhizoprionodon lalandii	R15	Copacabana	F	Pregnant adult	16.4037	ns*	6.2218
	Rhizoprionodon lalandii	R16	Copacabana	F	Pregnant adult	4.15754	ns*	ns*
	Rhizoprionodon lalandii	R17	Copacabana	F	Pregnant adult	3.88293	1.08	ns*
	Rhizoprionodon lalandii	R18	Copacabana	F	Pregnant adult	4.74758	0.63	0.3171
	Rhizoprionodon lalandii	R19	Copacabana	F	Pregnant adult	0.443802	0.10	0.0287
	Rhizoprionodon lalandii	R20	Copacabana	F	Pregnant adult	0.440956	0.07	0.0346
Cabo Frio	Species	Code	Sample Site	Sex	Development	Hg muscle (mg kg-1 w.w.)	Hg liver (mg kg-1 w.w.)	Hg brain (mg kg-1 w.w.)
	Rhizoprionodon porosus	R21	Cabo Frio	M	Juvenile	0.193	ns*	ns*
	Rhizoprionodon porosus	R22	Cabo Frio	M	Juvenile	0.379	0.092	ns*
	Rhizoprionodon porosus	R23	Cabo Frio	F	Juvenile	0.125	ns*	ns*
	Rhizoprionodon lalandii	R24	Cabo Frio	F	Juvenile	0.190	ns*	ns*
	Rhizoprionodon porosus	R25	Cabo Frio	M	Juvenile	0.102	ns*	ns*
	Rhizoprionodon porosus	R26	Cabo Frio	M	Juvenile	0.092	ns*	ns*
	Rhizoprionodon lalandii	R27	Cabo Frio	F	Juvenile	0.235	ns*	ns*
	Rhizoprionodon porosus	R28	Cabo Frio	M	Juvenile	0.093	ns*	ns*
	Rhizoprionodon porosus	R29	Cabo Frio	F	Juvenile	0.123	0.280	ns*
	Rhizoprionodon porosus	R30	Cabo Frio	F	Juvenile	0.311	ns*	ns*
	Rhizoprionodon porosus	R31	Cabo Frio	M	Juvenile	ns*	ns*	ns*
	Rhizoprionodon porosus	R32	Cabo Frio	F	Juvenile	0.069	ns*	ns*
	Rhizoprionodon porosus	R33	Cabo Frio	F	Juvenile	ns*	ns*	ns*
	Rhizoprionodon porosus	R34	Cabo Frio	M	Juvenile	0.104	ns*	ns*
	Rhizoprionodon porosus	R35	Cabo Frio	F	Juvenile	0.154	0.048	ns*
	Rhizoprionodon porosus	R36	Cabo Frio	F	Juvenile	0.206	0.130	ns*
	Rhizoprionodon porosus	R37	Cabo Frio	M	Juvenile	0.248	0.086	ns*
	Rhizoprionodon porosus	R38	Cabo Frio	M	Juvenile	0.080	ns*	ns*
	Rhizoprionodon porosus	R39	Cabo Frio	M	Juvenile	ns*	0.099	ns*
	Rhizoprionodon porosus	R40	Cabo Frio	F	Juvenile	ns*	ns*	ns*
	Rhizoprionodon porosus	R41	Cabo Frio	M	Juvenile	0.163	ns*	ns*
	Rhizoprionodon porosus	R42	Cabo Frio	M	Juvenile	0.219	ns*	ns*
	ns* = not sampled
